# Supplementary material for: Biotransformation of Geniposide into Genipin by ImmobilizedTrichoderma reeseiand Conformational Study of Genipin
Source: Hindawi journal article supplement (doi:10.1155/2018/2079195), 2018-01-01
Supplement: f1 [file 2079195.f1.pdf]

# Supporting Information

## **Biotransformation of geniposide into genipin by immobilized *Trichoderma reesei* and conformational study of genipin**

**Yishun Yang <sup>1,2</sup>, Yue Ding <sup>1</sup>, Tong Zhang <sup>1</sup>**

*<sup>1</sup>Experiment Centre of Teaching and Learning, Shanghai University of Traditional Chinese Medicine, Shanghai 201203, China*

*<sup>2</sup>School of Chinese Materia Medica, Shanghai University of Traditional Chinese Medicine, Shanghai 201203, China*

Correspondence should be addressed to Tong Zhang; zhangtdmj@hotmail.com.

Figure S1: UV-VIS spectrum of genipin in MeOH.

Figure S2: FTIR spectrum of genipin.

Figure S3: EIMS spectrum of genipin.

Figure S4: <sup>1</sup>H-NMR spectrum of genipin in CDCl<sub>3</sub>.

Figure S5: HPLC chromatograms of genipin using chiral columns under different conditions.

Figure S6: <sup>1</sup>H-NMR spectrum of acetylated genipin in C<sub>5</sub>D<sub>5</sub>N.

Figure S7: <sup>1</sup>H-NMR spectrum of geniposide in CDCl<sub>3</sub>.

Figure S8: <sup>1</sup>H-NMR spectrum of genipin in DMCO-d<sub>6</sub>.

Figure S9: <sup>1</sup>H-NMR spectrum of genipin in C<sub>5</sub>D<sub>5</sub>N.

Figure S10: <sup>1</sup>H-NMR spectrum of genipin in DMSO-d<sub>6</sub>.

Table S1: Crystallographic data of genipin.

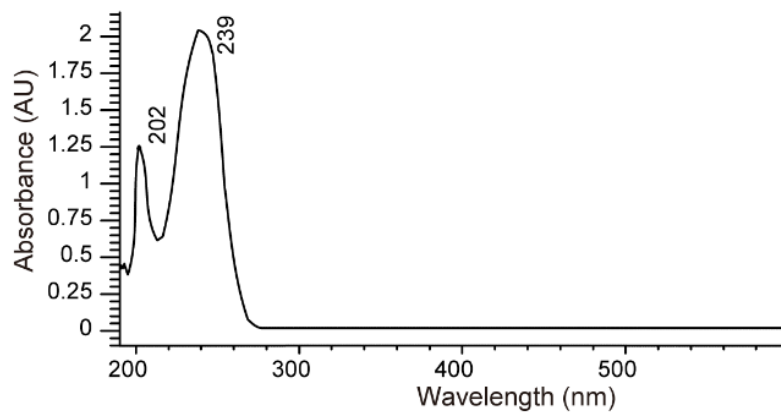

FIGURE S1: UV-VIS spectrum of genipin in MeOH.

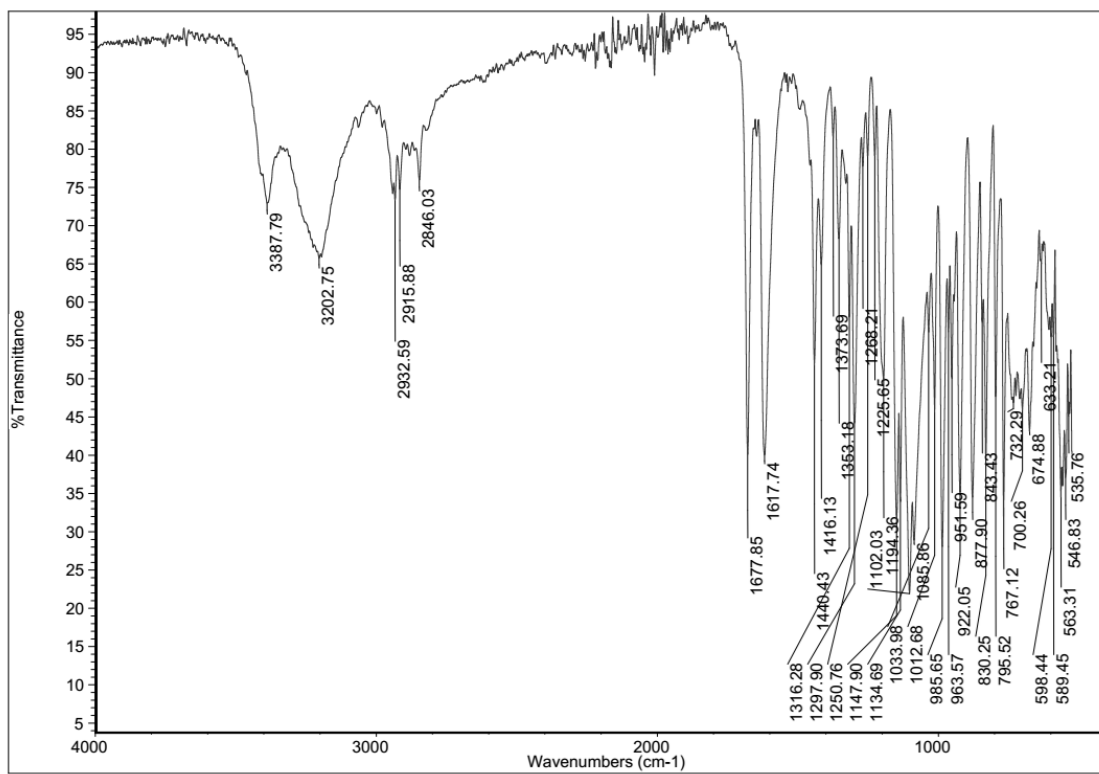

FIGURE S2: FTIR spectrum of genipin.

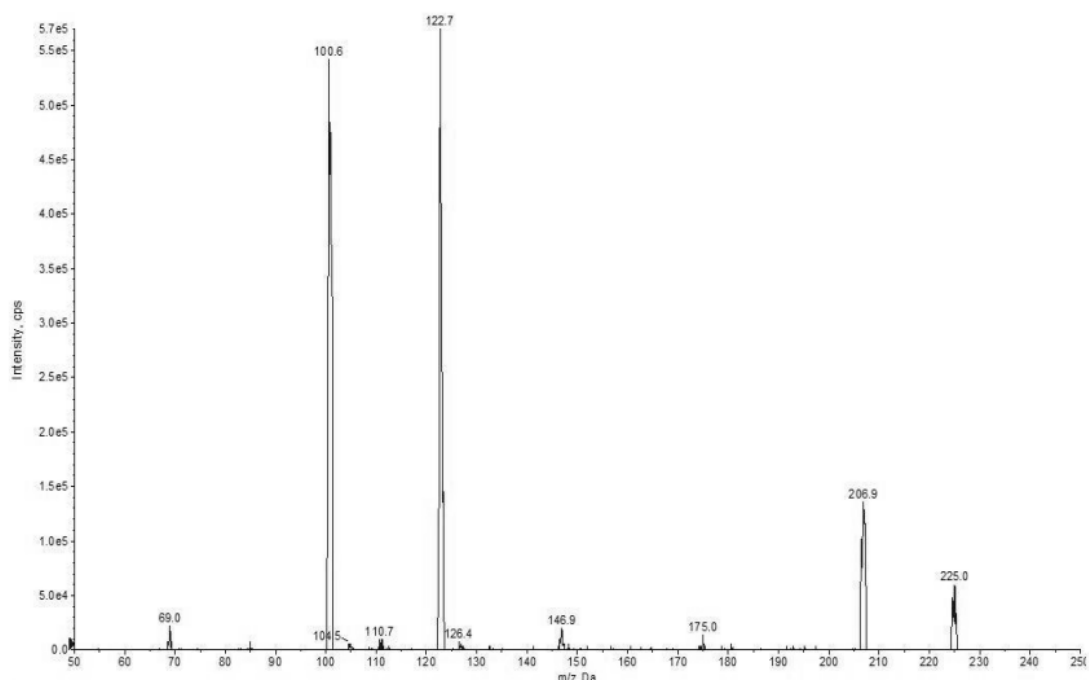

FIGURE S3: EIMS spectrum of genipin.

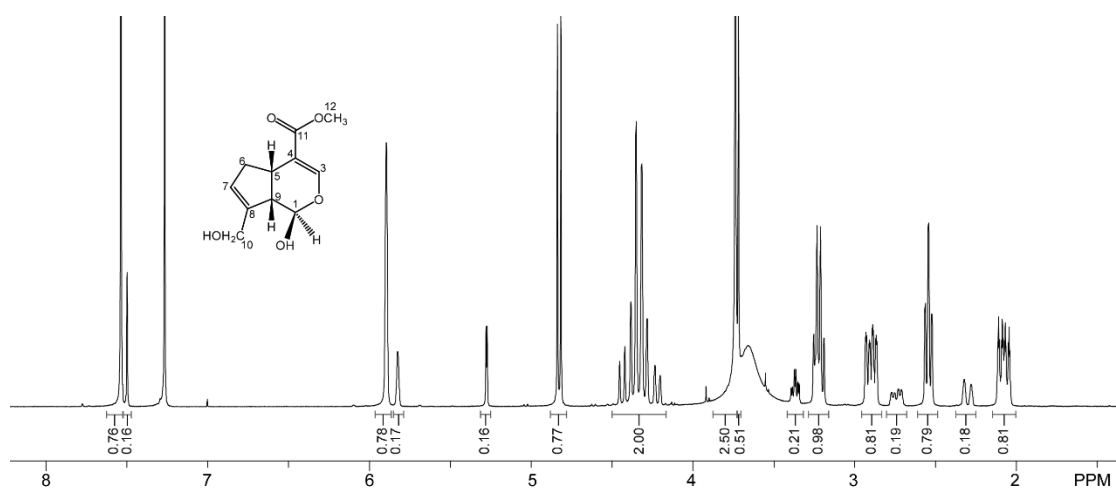

FIGURE S4: <sup>1</sup>H-NMR spectrum of genipin in CDCl<sub>3</sub>.

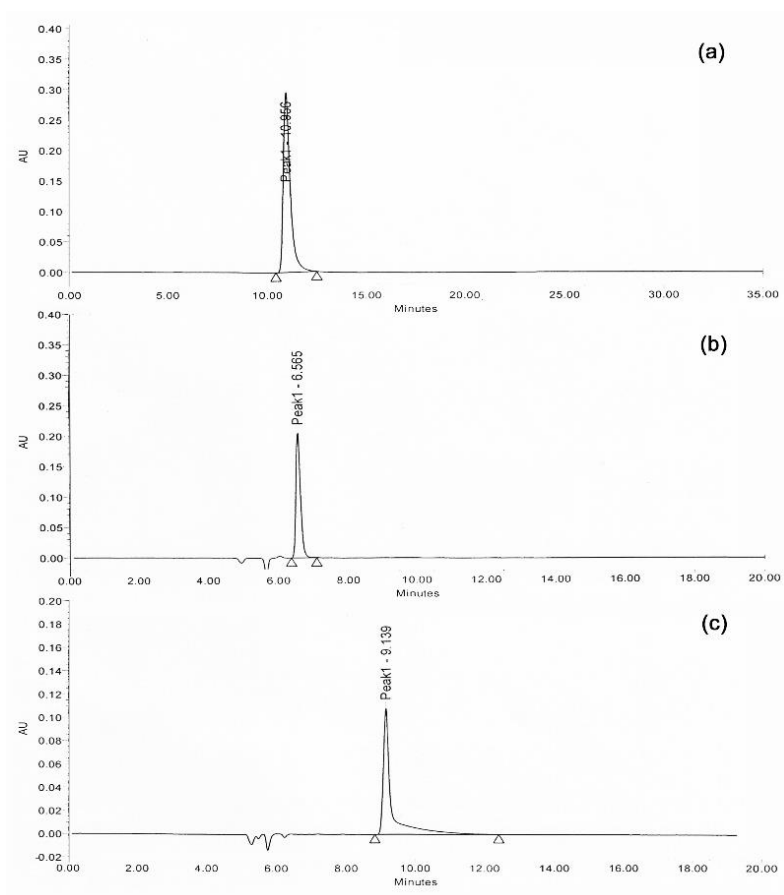

FIGURE S5: HPLC chromatograms of genipin using chiral columns under different conditions. (a) Entry 1; (b) Entry 2; (c) Entry 3.

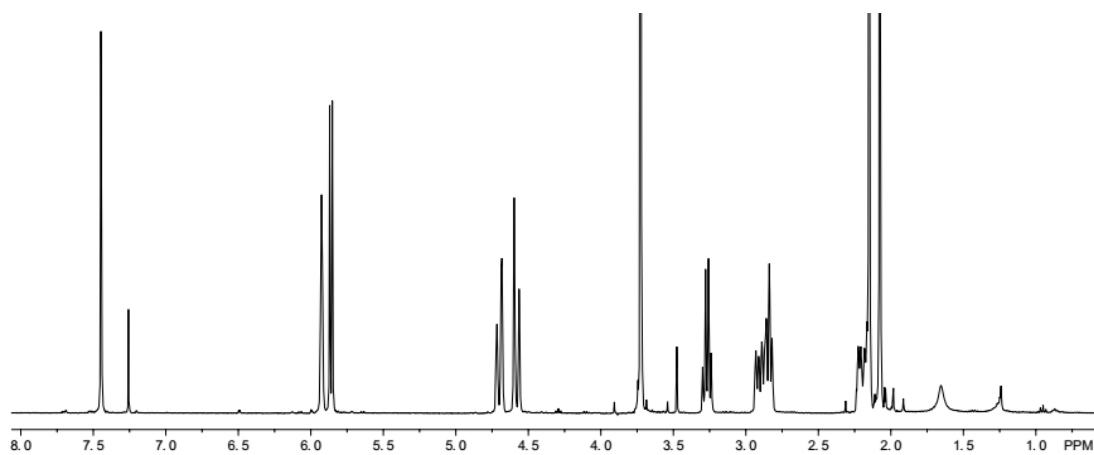

FIGURE S6:  $^1\text{H-NMR}$  spectrum of acetylated genipin in  $\text{C}_5\text{D}_5\text{N}$ .

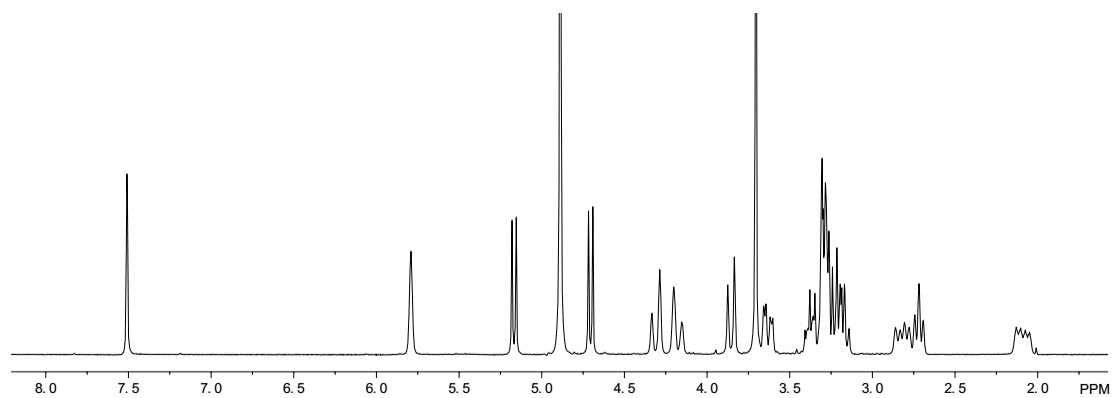

FIGURE S7:  $^1\text{H-NMR}$  spectrum of geniposide in  $\text{CDCl}_3$ .

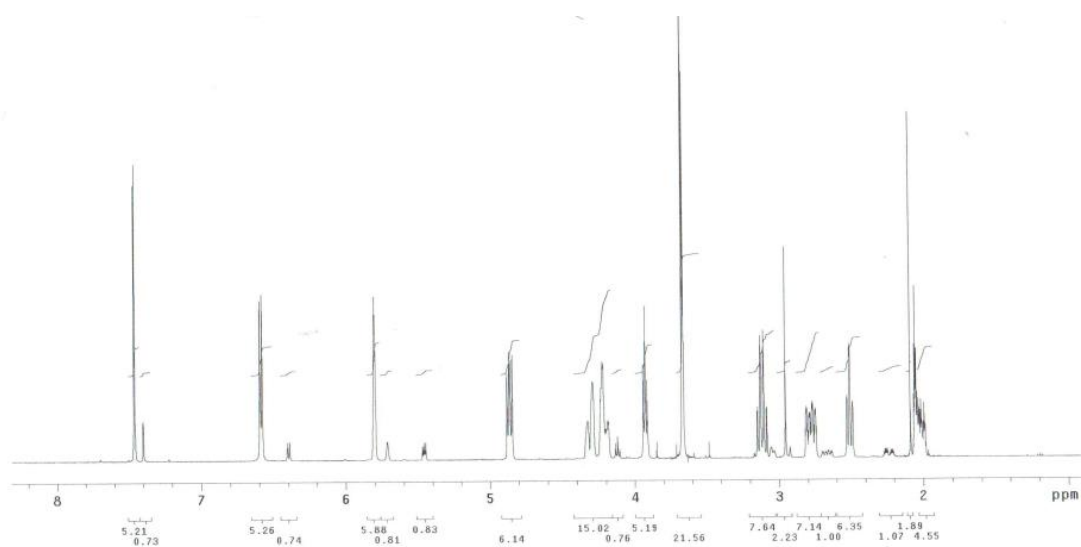

FIGURE S8:  $^1\text{H-NMR}$  spectrum of genipin in  $\text{DMCO-d}_6$ .

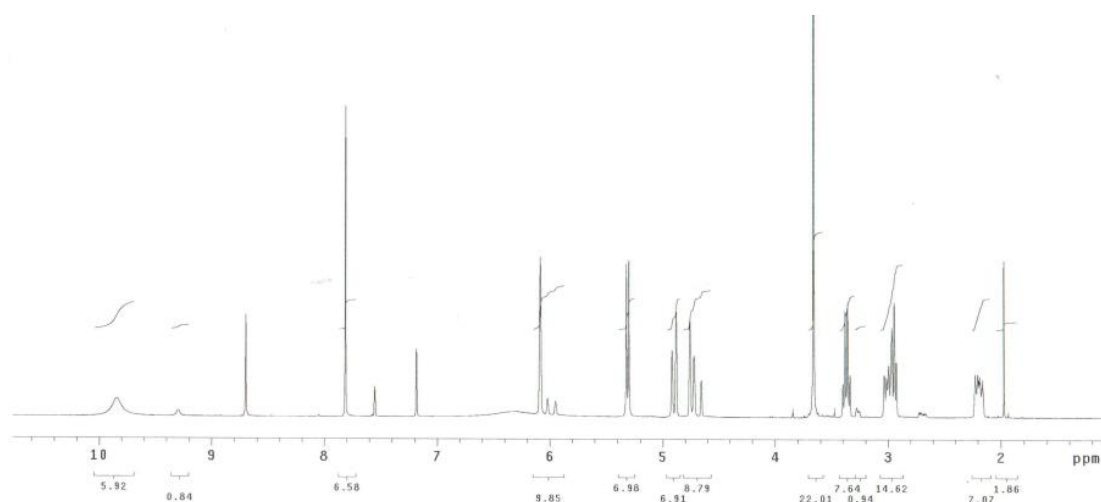

FIGURE S9:  $^1\text{H-NMR}$  spectrum of genipin in  $\text{C}_5\text{D}_5\text{N}$ .

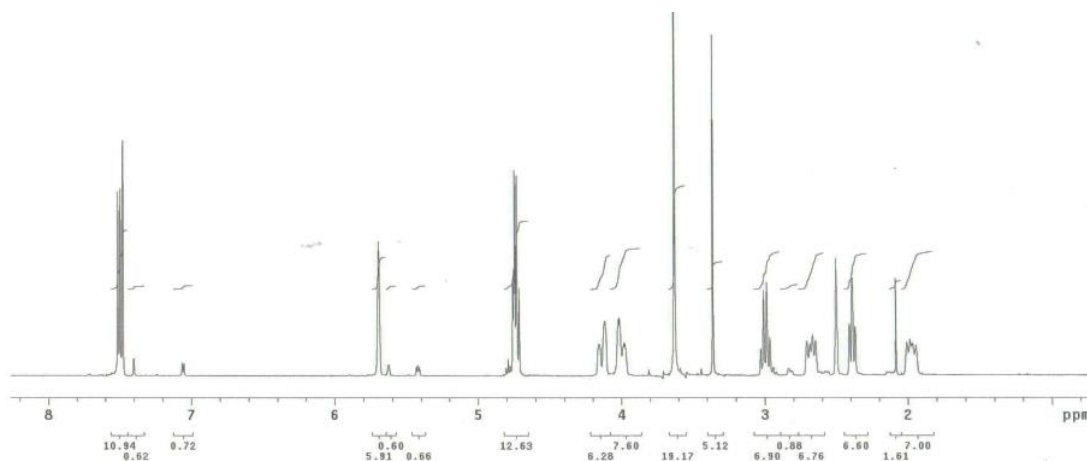

FIGURE S10:  $^1\text{H}$ -NMR spectrum of genipin in  $\text{DMSO-d}_6$ .

TABLE S1: Crystallographic data of genipin.

|                                      |                                                                                                                      |
|--------------------------------------|----------------------------------------------------------------------------------------------------------------------|
| Empirical formula                    | $\text{C}_{11}\text{H}_{14}\text{O}_5$                                                                               |
| Formula weight                       | 226.22                                                                                                               |
| Temperature                          | 293(2) K                                                                                                             |
| Wavelength                           | 0.71073 Å                                                                                                            |
| Crystal system                       | monoclinic                                                                                                           |
| Space group (number)                 | P2 (1)                                                                                                               |
| Unit cell dimensions                 | a=7.563(7) Å<br>b=17.799(17) Å<br>c=8.151(8) Å<br>$\alpha=90^\circ$<br>$\beta=93.720(17)^\circ$<br>$\gamma=90^\circ$ |
| Volume                               | 1094.9(19) Å <sup>3</sup>                                                                                            |
| Z                                    | 4                                                                                                                    |
| Calculated density                   | 1.372 mg/m <sup>3</sup>                                                                                              |
| Absorption coefficient               | 0.109 mm <sup>-1</sup>                                                                                               |
| F(000)                               | 480                                                                                                                  |
| Crystal size                         | 0.402 × 0.369 × 0.211 mm                                                                                             |
| $\theta$ range for data collection   | 2.29-25.50°                                                                                                          |
| Limiting indices                     | $-9 \leq h \leq 9$ , $-21 \leq k \leq 20$ , $-6 \leq l \leq 9$                                                       |
| Reflections collected/ unique        | 5288/3614 [R(int)=0.0465]                                                                                            |
| Data/restrictions/parameters         | 3614/1/295                                                                                                           |
| Refinement method                    | Full-matrix least-squares on $F^2$                                                                                   |
| Goodness-of-fit on $F^2$             | 1.083                                                                                                                |
| Final R indices [ $I > 2\sigma(I)$ ] | R1 = 0.0757; wR2 = 0.1930                                                                                            |
| R indices (all data)                 | R1 = 0.0882 wR2 = 0.2022                                                                                             |
| Largest diff. peak and hole          | 0.457 and -0.226 e <sup>-</sup> Å <sup>-3</sup>                                                                      |
